# Supplementary material for: Super-Toughened Fumed-Silica-Reinforced Thiol-Epoxy Composites Containing Epoxide-Terminated Polydimethylsiloxanes
Source: MDPI journal article supplement (doi:10.3390/ijms22158097), 2021-07-28
Supplement: s1 [file s1]

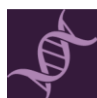

Supplementary Materials

# Super-Toughened Fumed-Silica-Reinforced Thiol-Epoxy Composites Containing Epoxide-Terminated Polydimethylsiloxanes

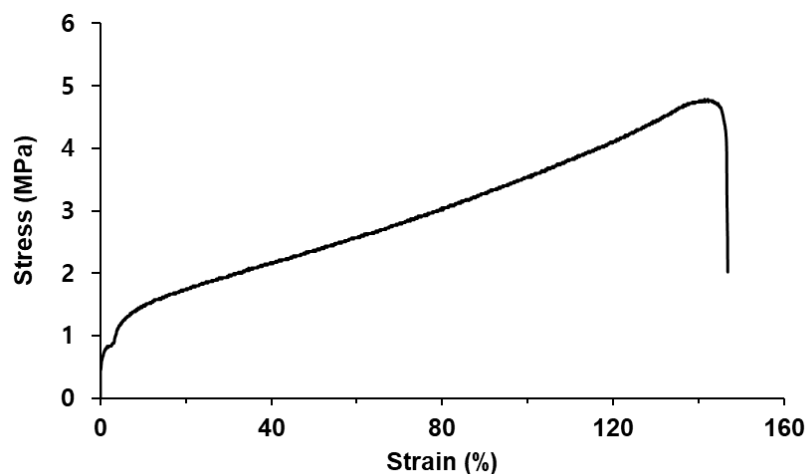

**Figure S1.** A stress-strain curve of BPDGE/thiol/MI.

**Table S1.** Mechanical properties of the BPDGE/thiol/MI system and control composite.

|                                      | BPDGE/thiol/MI  | Control composite |
|--------------------------------------|-----------------|-------------------|
| Tensile strength (MPa)               | $5.2 \pm 0.4$   | $5.8 \pm 0.3$     |
| Elongation at break (%)              | $143 \pm 3.8$   | $93 \pm 5.9$      |
| Young's modulus (MPa)                | $12.8 \pm 0.4$  | $25.9 \pm 0.3$    |
| Toughness (MJ/m <sup>3</sup> )       | $4.48 \pm 0.16$ | $3.37 \pm 0.55$   |
| Impact strength (KJ/m <sup>2</sup> ) | $40.2 \pm 2.0$  | $26.0 \pm 1.2$    |

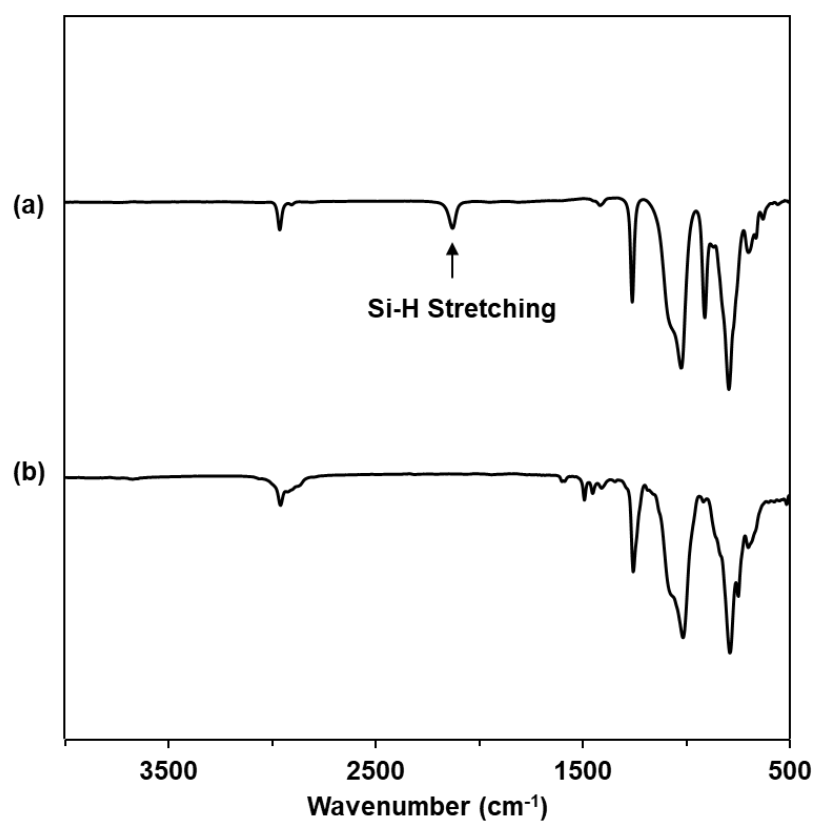

Figure S2. FTIR spectra of (a) h-PDMS and (b) ep-PDMS.

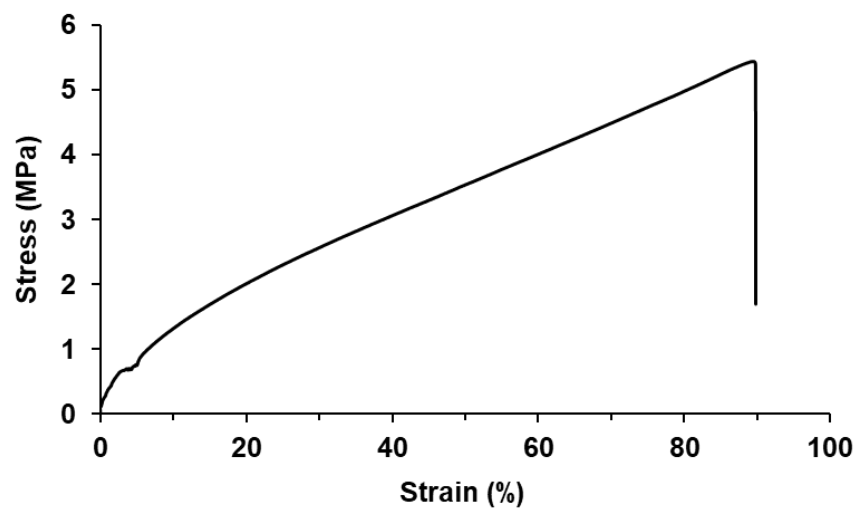

Figure S3. A stress-strain curve of the control composite.

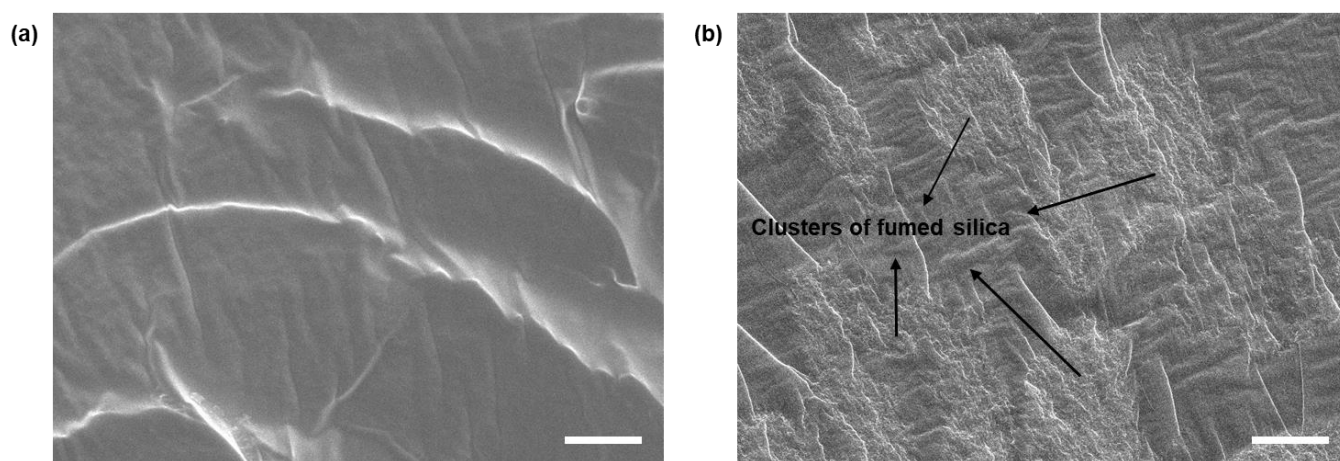

**Figure S4.** FESEM images of the fractured surfaces of (a) NC-3 and (b) the control composite. A scale bar represents 10 µm.

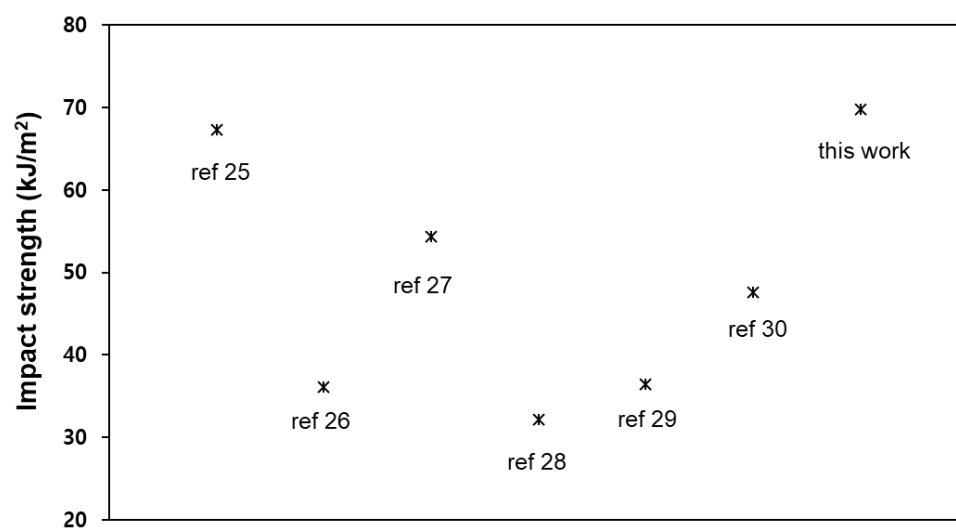

**Figure S5.** Selected reinforced epoxy composites and their maximum impact strength.
